# Supplementary material for: Knowledge, attitudes and practices towards rabies: questionnaire survey in rural household heads of Gondar Zuria District, Ethiopia
Source: PubMed Central journal article supplement (PMC4566865; doi:10.1186/s13104-015-1357-8), 2015-09-02
Supplement: 13104_2015_1357_MOESM3_ESM.pdf [file 13104_2015_1357_MOESM3_ESM.pdf]

Table 3: Time to look for treatment and treatment preference

| Variable                      |                                              | Number | Percent |
|-------------------------------|----------------------------------------------|--------|---------|
| Time to look for<br>treatment | Immediately                                  | 179    | 44.8    |
|                               | 2 to 7 days                                  | 114    | 28.5    |
|                               | 8 to 40 days                                 | 85     | 21.3    |
|                               | Do not know                                  | 2      | 5.5     |
| Preference of<br>treatment    | modern medicine                              | 155    | 38.8    |
|                               | traditional medicine                         | 140    | 35      |
|                               | Holy water                                   | 56     | 14      |
|                               | traditional medicine with<br>holy water      | 24     | 6       |
|                               | traditional medicine with<br>modern medicine | 10     | 2.5     |
|                               | Holy water with modern<br>medicine           | 10     | 2.5     |
|                               |                                              |        |         |
