# Supplementary material for: Knowledge, attitudes and practices towards rabies: questionnaire survey in rural household heads of Gondar Zuria District, Ethiopia
Source: PubMed Central journal article supplement (PMC4566865; doi:10.1186/s13104-015-1357-8), 2015-09-02
Supplement: 13104_2015_1357_MOESM4_ESM.pdf [file 13104_2015_1357_MOESM4_ESM.pdf]

Table 4: Dog bite, response to dog bite and education about rabies

| Variables               | Response                                        | Number | Percent |
|-------------------------|-------------------------------------------------|--------|---------|
| Dog bite                | Yes                                             | 166    | 41.5    |
|                         | No                                              | 234    | 57.5    |
| Action taken after bite | washing of the wound with water/ soap and water | 51     | 30.7    |
|                         | Traditional medicine                            | 53     | 31.9    |
|                         | Did nothing                                     | 33     | 19.9    |
|                         | Went to health facilities                       | 20     | 12.1    |
| Education about rabies  | No                                              | 347    | 86.8    |
|                         | Yes                                             | 53     | 12.6    |
